# Supplementary material
Source: PubMed Central journal article supplement (PMC7747162)
Supplement: JCB908356_Supplemental_Material.pdf [file JCB908356_Supplemental_Material.pdf]

Supplementary Table 1. MSP characteristics

|                                      | MSP-normal    | MSP-slow      | <i>p</i> -value    |
|--------------------------------------|---------------|---------------|--------------------|
| <b>Demographics</b>                  |               |               |                    |
| Age (years)                          | 45.90 (10.81) | 48.18 (10.86) | 0.576              |
| Sex (% Female)                       | 61.90         | 45.45         | 0.373 <sup>a</sup> |
| Education (years)                    | 16.40 (2.80)  | 15.45 (2.21)  | 0.342              |
| Brain Parenchymal Fraction (%)       | 72.72 (6.06)  | 66.59 (4.61)  | 0.006              |
| <b>Patient characteristics</b>       |               |               |                    |
| Disease Duration (years)             | 8.28 (5.98)   | 15.00 (9.43)  | 0.029              |
| Lesion volume (mL)                   | 3.21 (2.83)   | 15.84 (13.01) | 0.009              |
| EDSS                                 | 2.56 (1.50)   | 4.55 (1.88)   | 0.005              |
| Modified Fatigue Impact Scale (MFIS) | 36.24 (15.24) | 47.20 (12.60) | 0.058              |
| <b>Task performance</b>              |               |               |                    |
| Button-press frequency (Hz)          | 1.90 (0.07)   | 1.95 (0.06)   | 0.130              |
| Nine-Hole-Peg Test (sec)             | 20.28 (1.81)  | 33.22 (8.39)  | <0.001             |

<sup>a</sup> Pearson chi-squared test

Supplemental Table 2. Mean (standard deviation) values from (top) healthy controls (HC) and MS patients (MSP) in the task-central and task-surround ROIs and (bottom) MSP-normal and MS-slow. Levene's test and t-tests were performed with  $p$ -values displayed.  $M$  is derived from the M1 ROI and used in the CMRO<sub>2</sub> calculation.

|                                | HC                 | MSP                | Levene's<br>$p$ -value | $T$ -test<br>$p$ -value |
|--------------------------------|--------------------|--------------------|------------------------|-------------------------|
| $M$                            | 0.085 (0.06)       | 0.062 (0.03)       | 0.018                  | 0.152                   |
| <b>Task-central ROI</b>        |                    |                    |                        |                         |
| $\Delta$ BOLD (%)              | 0.639 (0.21)       | 0.735 (0.34)       | 0.104                  | 0.295                   |
| $\Delta$ CBF (%)               | 33.63 (10.13)      | 51.51(27.87)       | 0.003                  | 0.002                   |
| $\Delta$ CMRO <sub>2</sub> (%) | 10.54 (12.80)      | 19.79 (17.13)      | 0.279                  | 0.039                   |
| # of voxels                    | 5597.00 (3253.59)  | 5014.84 (3942.79)  | 0.578                  | 0.605                   |
| <b>Task-surround ROI</b>       |                    |                    |                        |                         |
| $\Delta$ BOLD (%)              | 0.099 (0.17)       | 0.099 (0.33)       | 0.175                  | 0.997                   |
| $\Delta$ CBF (%)               | 8.37 (6.04)        | 6.96 (12.88)       | 0.027                  | 0.605                   |
| $\Delta$ CMRO <sub>2</sub> (%) | 3.71 (7.60)        | 3.38 (11.20)       | 0.231                  | 0.914                   |
| # of voxels                    | 45835.35 (3967.29) | 46239.13 (6137.46) | 0.074                  | 0.808                   |
|                                | MSP-normal         | MSP-slow           |                        |                         |
| <b>Task-central ROI</b>        |                    |                    |                        |                         |
| $\Delta$ BOLD (%)              | 0.815 (0.363)      | 0.583 (0.229)      | 0.207                  | 0.065                   |
| $\Delta$ CBF (%)               | 54.03 (28.95)      | 46.71 (26.32)      | 0.700                  | 0.490                   |
| $\Delta$ CMRO <sub>2</sub> (%) | 20.57 (18.76)      | 18.30 (14.23)      | 0.708                  | 0.728                   |
| <b>Task-surround ROI</b>       |                    |                    |                        |                         |
| $\Delta$ BOLD (%)              | 0.105 (0.369)      | 0.087 (0.252)      | 0.505                  | 0.890                   |
| $\Delta$ CBF (%)               | 10.74 (13.53)      | -0.26 (7.78)       | 0.136                  | 0.019                   |
| $\Delta$ CMRO <sub>2</sub> (%) | 5.95 (11.36)       | -1.52 (9.49)       | 0.359                  | 0.072                   |

Supplemental Table 3. Mean (standard deviation) values from (top) healthy controls (HC) and MS patients (MSP) in the task-negative ( $T < -1.96$ ) ROIs and (bottom) MSP-normal and MS-slow. Levene's test and t-tests were performed with  $p$ -values displayed.

|                                | HC ( $n = 13$ )         | MSP ( $n = 25$ )     | Levene's<br>$p$ -value | $T$ -test<br>$p$ -value |
|--------------------------------|-------------------------|----------------------|------------------------|-------------------------|
| M                              | 0.107 (0.07)            | 0.088 (0.05)         | 0.045                  | 0.355                   |
| <b>Task-negative ROI</b>       |                         |                      |                        |                         |
| $\Delta$ BOLD (%)              | -0.469 (0.32)           | -0.993 (1.96)        | 0.190                  | 0.348                   |
| $\Delta$ CBF (%)               | -34.88 (33.38)          | -56.50 (93.53)       | 0.392                  | 0.427                   |
| $\Delta$ CMRO <sub>2</sub> (%) | -25.52 (33.86)          | -35.19 (55.70)       | 0.545                  | 0.571                   |
| # of voxels                    | 469.23 (649.80)         | 552.32 (631.72)      | 0.904                  | 0.705                   |
|                                | MSP-normal ( $n = 16$ ) | MSP-slow ( $n = 9$ ) |                        |                         |
| <b>Task-negative ROI</b>       |                         |                      |                        |                         |
| $\Delta$ BOLD (%)              | -1.22 (2.43)            | -0.60 (0.49)         | 0.236                  | 0.462                   |
| $\Delta$ CBF (%)               | -69.38 (115.73)         | -33.61 (14.45)       | 0.112                  | 0.370                   |
| $\Delta$ CMRO <sub>2</sub> (%) | -43.70 (68.15)          | -20.07 (14.09)       | 0.066                  | 0.319                   |
| # of voxels                    | 459.69 (726.50)         | 717.00 (399.87)      | 0.373                  | 0.339                   |
